# Supplementary material for: Diblock copolymers consisting of a redox polymer block based on a stable radical linked to an electrically conducting polymer block as cathode materials for organic radical batteries
Source: Royal Society of Chemistry journal article supplement (doi:10.1039/c9py00268e), 2019-01-01
Supplement: c9py00268e1.pdf [file c9py00268e1.pdf]

## Supporting Information

# Diblock copolymers consisting of a redox polymer block based on a stable radical linked to an electrically conducting polymer block as cathode materials for organic radical batteries

Noémie Hergué<sup>[a]\*</sup>, Bruno Ernould<sup>[b]</sup>, Andrea Minoia<sup>[c]</sup>, Julien De Winter<sup>[d]</sup>, Pascal Gerbaux<sup>[d]</sup>, Roberto Lazzaroni<sup>[c]</sup>, Jean-François Gohy<sup>[b]</sup>, Philippe Dubois<sup>[a]</sup> and Olivier Coulembier<sup>[a]</sup>

<sup>a</sup>Laboratory of Polymeric and Composite Materials (LPCM), Center of Innovation and Research in Materials and Polymers (CIRMAP), University of Mons-UMONS, 20 Place du Parc, B-7000 Mons, Belgium

<sup>b</sup>Institute of Condensed Matter and Nanosciences (IMCN), Bio- and Soft Matter (BSMA), Université Catholique de Louvain, Place L. Pasteur 1, B-1348, Louvain-la-Neuve, Belgium

<sup>c</sup>Laboratory for Chemistry of Novel Materials, Center of Innovation and Research in Materials and Polymers (CIRMAP), University of Mons-UMONS, 20 Place du Parc, B-7000 Mons, Belgium

<sup>d</sup>Organic Synthesis and Mass Spectrometry Laboratory, Interdisciplinary Center for Mass Spectrometry, University of Mons-UMONS, 23 Place du Parc, 7000 Mons, Belgium

|                                                                                                                                                                                                    |   |
|----------------------------------------------------------------------------------------------------------------------------------------------------------------------------------------------------|---|
| Figure S1. Synthetic route of the diblock P3HT- <i>b</i> -PTMA using P3HT as macroinitiator for copolymerization of TPM by ATRP.                                                                   | 2 |
| Figure S2. Synthesis of the 3-azidopropyl 2-bromoisobutyrate (N <sub>3</sub> -Ini)                                                                                                                 | 2 |
| Figure S3. Synthesis of P3HT with unselective introduction of protected alkyne                                                                                                                     | 2 |
| Figure S4. Synthetic pathway to prepare the mono protected alkyne-P3HT                                                                                                                             | 3 |
| Figure S5. SEC trace of the P3HT <sub>31</sub> recorded in THF using PS standards.                                                                                                                 | 3 |
| Figure S6. Magnification of the MALDI-ToF spectrum. Identification of the 3-hexylthiophene repeating unit (C <sub>10</sub> H <sub>14</sub> : 166.1 uma)                                            | 4 |
| Figure S7. Magnification of the MALDI-ToF spectrum. Comparison between the experimental spectrum and the expecting polymer with a DP of 26.                                                        | 4 |
| Figure S8. <sup>1</sup> H NMR of the P3HT <sub>31</sub> recorded in CDCl <sub>3</sub> .                                                                                                            | 4 |
| Figure S9. SEC traces comparison between a P3HT <sub>31</sub> -PrAlk and its corresponding P3HT <sub>31</sub> - <i>b</i> -PTMA <sub>87</sub> diblock copolymer recorded in THF using PS standards. | 5 |
| Figure S10. FTIR spectra of the parent homopolymers vs block copolymers P3HT- <i>b</i> -PTMA                                                                                                       | 6 |
| Figure S11. Cyclic voltammogram of P3HT <sub>31</sub> - <i>b</i> -PTMA <sub>87</sub> recorded at 0.1mV/s.                                                                                          | 7 |

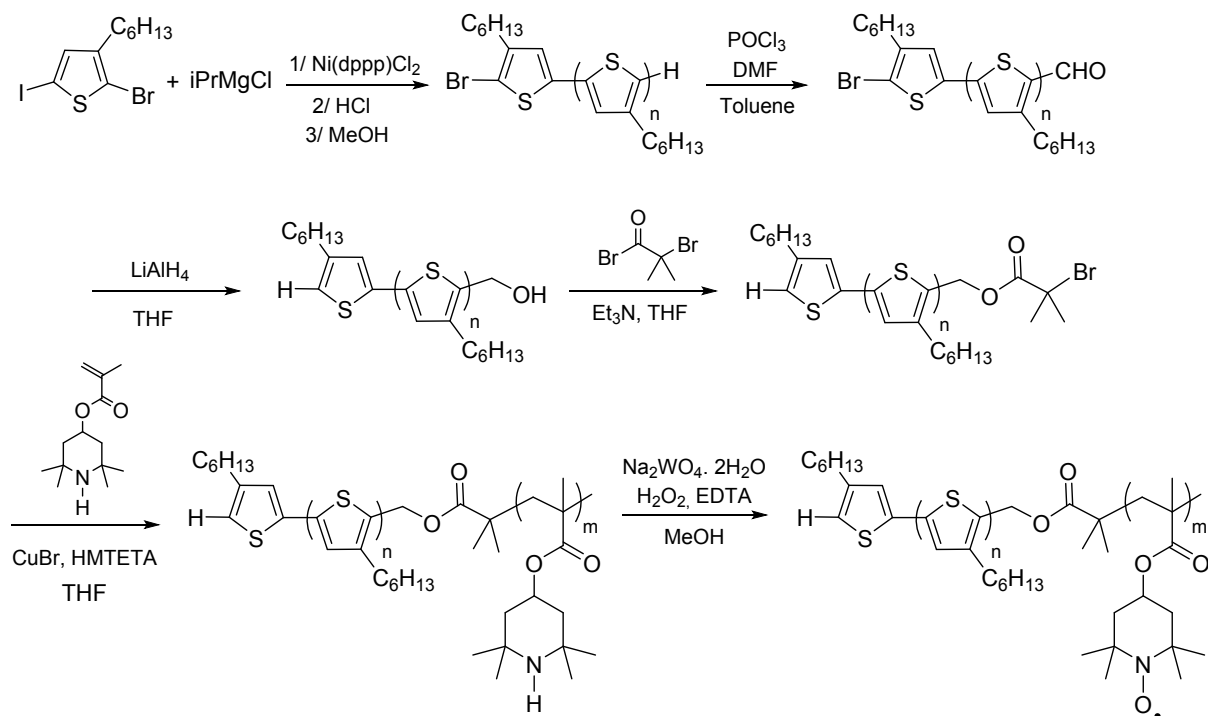

Figure S1. Synthetic route of the diblock P3HT-b-PTMA using P3HT as macroinitiator for copolymerization of TPM by ATRP.

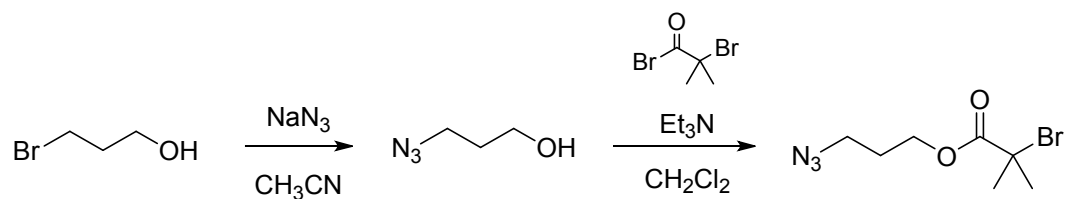

Figure S2. Synthesis of the 3-azidopropyl 2-bromoisobutyrate ( $N_3$ -Ini)

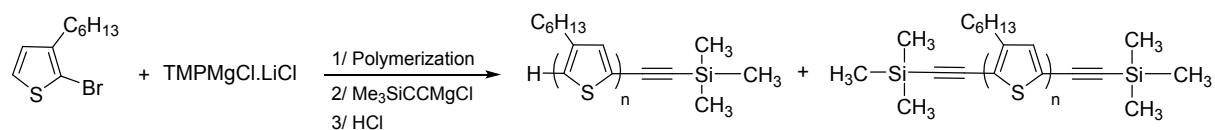

Figure S3. Synthesis of P3HT with unselective introduction of protected alkyne

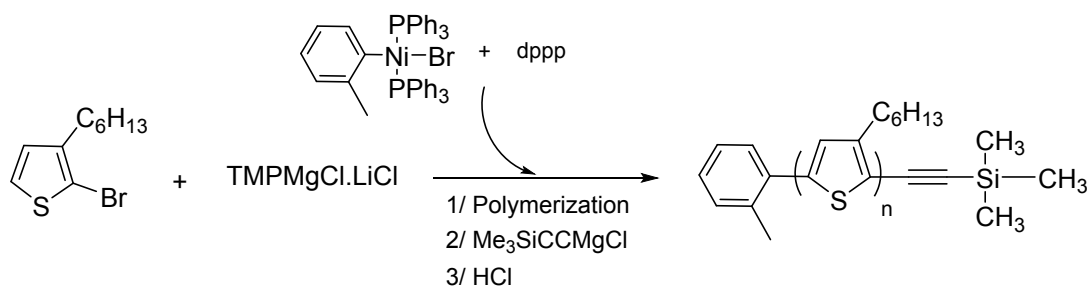

Figure S4. Synthetic pathway to prepare the mono protected alkyne-P3HT

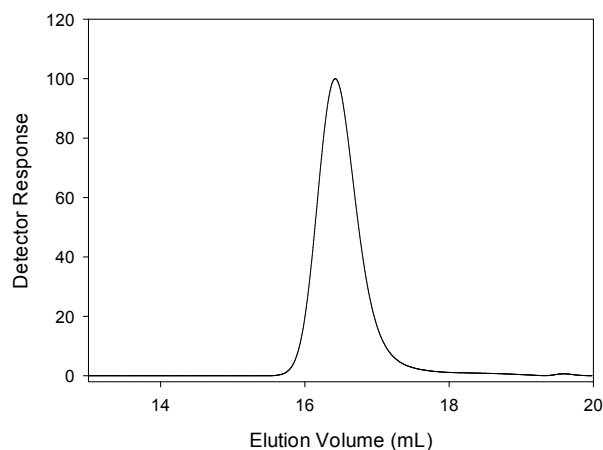

Figure S5. SEC trace of the P3HT<sub>31</sub> recorded in THF using PS standards.

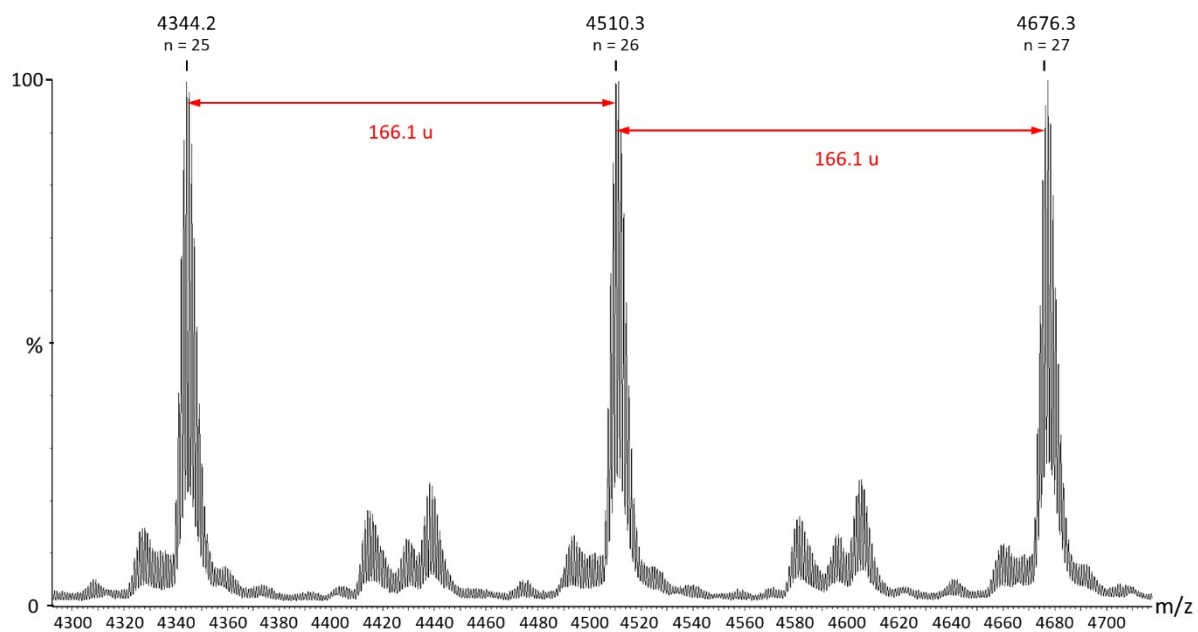

Figure S6. Magnification of the MALDI-ToF spectrum. Identification of the 3-hexylthiophene repeating unit ( $C_{10}H_{14}$  : 166.1 uma)

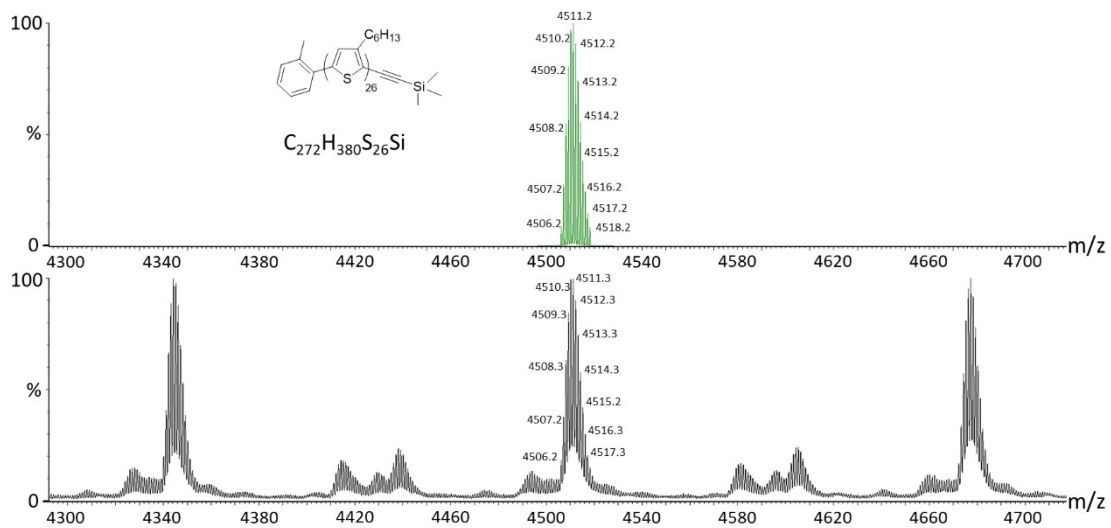

Figure S7. Magnification of the MALDI-ToF spectrum. Comparison between the experimental spectrum and the expecting polymer with a DP of 26.

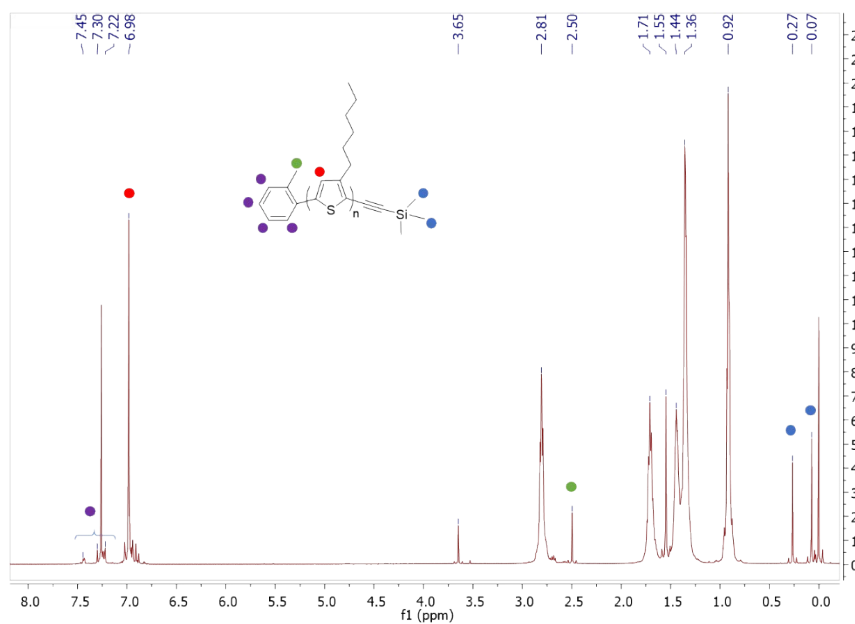

Figure S8.  $^1H$  NMR of the  $P3HT_{31}$  recorded in  $CDCl_3$ .

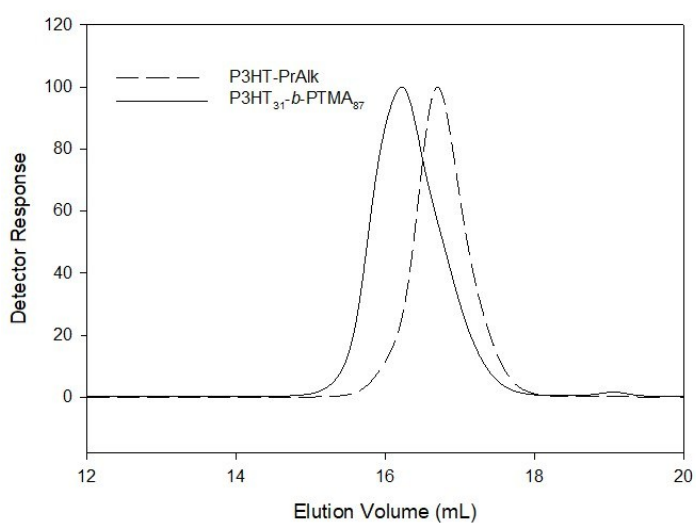

Figure S9. SEC traces comparison between a P3HT<sub>31</sub>-PrAlk and its corresponding P3HT<sub>31</sub>-b-PTMA<sub>87</sub> diblock copolymer recorded in THF using PS standards.

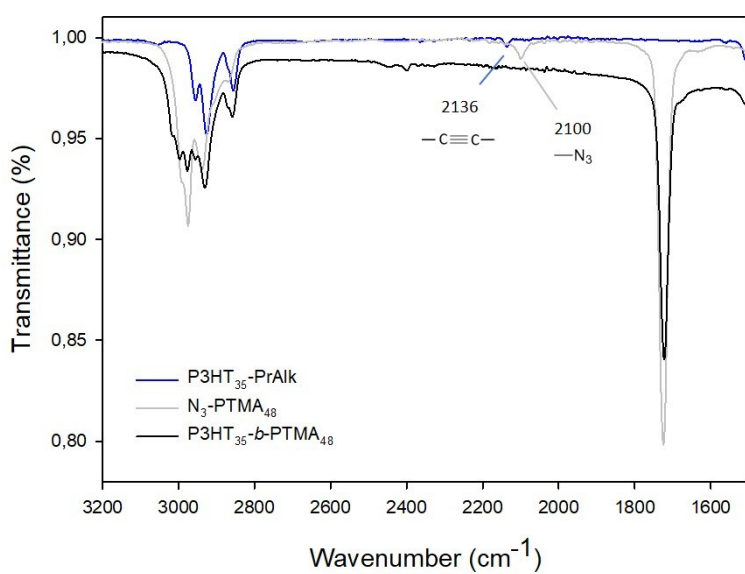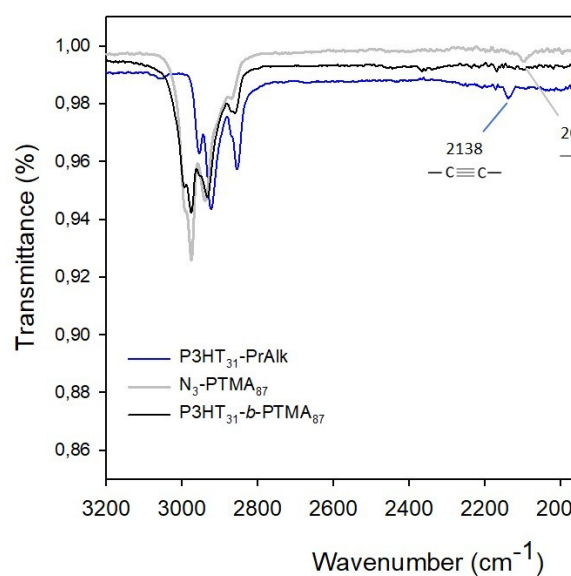

Figure S10. FTIR spectra of the parent homopolymers vs block copolymers P3HT-*b*-PTMA

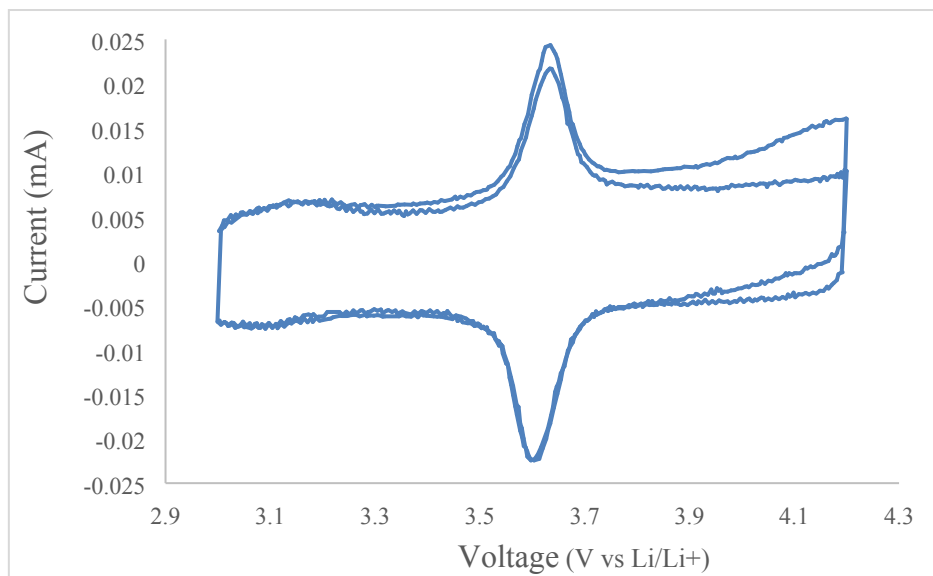

Figure S11. Cyclic voltammogram of P3HT<sub>31</sub>-b-PTMA<sub>87</sub> recorded at 0.1mV/s.
